# Supplementary material for: Nanocrystallization Improves the Solubilization and Cytotoxic Effect of a Poly (ADP-Ribose)-Polymerase-I Inhibitor
Source: MDPI journal article supplement (doi:10.3390/polym14224827), 2022-11-09
Supplement: s1 [file s1]

# Supplementary Materials

At pH 1.2

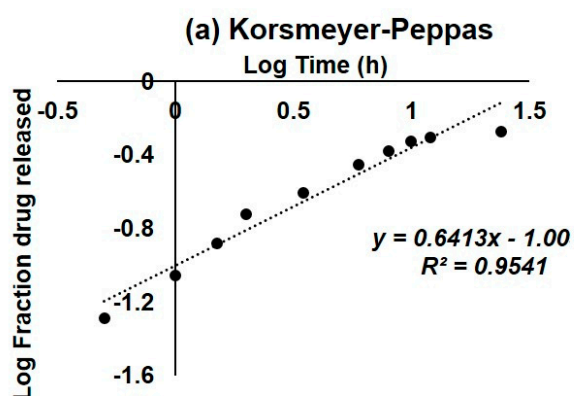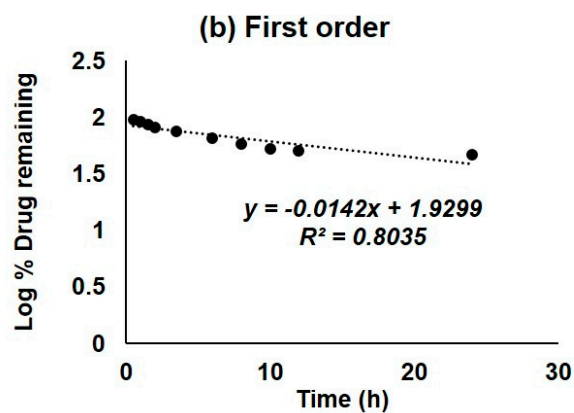

At pH 6.8

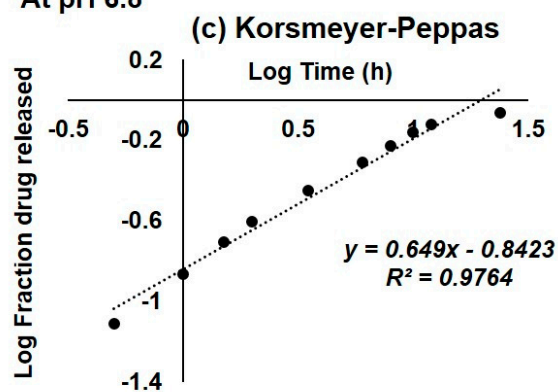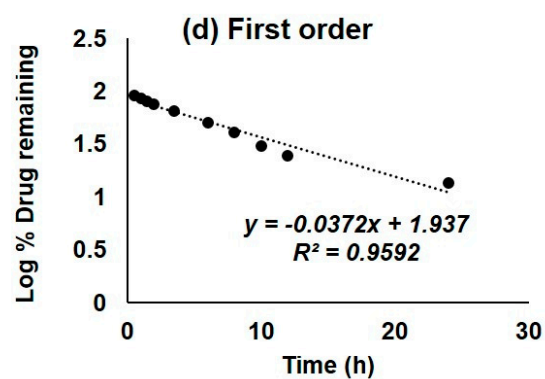

**Figure S1.** Release kinetics of OLA from NCs that followed the Korsmeyer-Peppas models at pH 1.2 and 6.8 (a) and (b), respectively, while second best fit-model was first order at pH 1.2 and 6.8 (c) and (d), respectively.
